# Supplementary material for: Magnetoencephalography for epileptic focus localization in a series of 1000 cases
Source: Oxford University Press journal article supplement (doi:10.1093/brain/awz231), 2019-07-09
Supplement: awz231_supplementary_data.pdf [file awz231_supplementary_data.pdf]

## SUPPLEMENTARY TABLES

| Focus hypothesis |                               |
|------------------|-------------------------------|
| <b>1 lobe</b>    | 678 patients (885 recordings) |
| <b>2 lobes</b>   | 173 (210)                     |
| <b>3+ lobes</b>  | 41 (49)                       |
|                  |                               |
| <b>frontal</b>   | 425 patients                  |
| <b>temporal</b>  | 645                           |
| <b>parietal</b>  | 179                           |
| <b>occipital</b> | 105                           |
| <b>insula</b>    | 11                            |
| <b>unclear</b>   | 85                            |
|                  |                               |
| <b>left</b>      | 418                           |
| <b>right</b>     | 407                           |
| <b>bilateral</b> | 87                            |
| <b>unclear</b>   | 88                            |

Supplementary table 1: Summary of putative focus location based on the consensus of presurgical evaluation (“focus hypothesis”).

| Spike detection            |                             |
|----------------------------|-----------------------------|
| <b>First recording</b>     | 692 of 965 recordings (71%) |
| <b>Repeated recordings</b> | 191 of 266 (72%)            |
|                            |                             |
| <b>extra-temporal</b>      | 458 of 592 recordings (77%) |
| <b>frontal</b>             | 325 of 413 (79%)            |
| <b>parietal</b>            | 132 of 171 (77%)            |
| <b>occipital</b>           | 76 of 100 (76%)             |
| <b>insular</b>             | 8 of 11 (73%)               |
|                            |                             |
| <b>temporal</b>            | 423 of 625 (68%)            |
| <b>mesial temporal</b>     | 90 of 132 (68%)             |

Supplementary table 2: Spike detection rates in different subgroups.

| Resection       | Outcome (≥1 year) |           | p<br>(Chi-Square test) |
|-----------------|-------------------|-----------|------------------------|
|                 | Engel 1           | >Engel 1  | < 0.001                |
| <b>Complete</b> | 55                | 11        |                        |
| <b>Partial</b>  | 19                | 34        |                        |
| <b>No</b>       | 10                | 20        |                        |
|                 |                   |           |                        |
|                 | Engel 1a          | >Engel 1a | 0.004                  |
| <b>Complete</b> | 34                | 32        |                        |
| <b>Partial</b>  | 13                | 40        |                        |
| <b>No</b>       | 8                 | 22        |                        |

Supplementary table 3a: Resection extent of MEG localizations vs. last available postsurgical outcome after at least 1 year (median 5.0y follow-up, 1<sup>st</sup> quartile 2.0y, 3<sup>rd</sup> quartile 7.0y).

| Resection       | Outcome (≥5 year) |           | p<br>(Chi-Square test) |
|-----------------|-------------------|-----------|------------------------|
|                 | Engel 1           | >Engel 1  | < 0.001                |
| <b>Complete</b> | 35                | 8         |                        |
| <b>Partial</b>  | 10                | 10        |                        |
| <b>No</b>       | 2                 | 13        |                        |
|                 |                   |           |                        |
|                 | Engel 1a          | >Engel 1a | 0.005                  |
| <b>Complete</b> | 20                | 23        |                        |
| <b>Partial</b>  | 7                 | 13        |                        |
| <b>No</b>       | 0                 | 15        |                        |

Supplementary table 3b: Resection extent of MEG localizations vs. long-term outcome after at least 5 years (median 7.0y follow-up, 1<sup>st</sup> quartile 5.0y, 3<sup>rd</sup> quartile 11.0y).

| <b>Complete MEG resection</b> |                               |
|-------------------------------|-------------------------------|
| <b>Follow-up</b>              | <b>All (including &lt;1y)</b> |
| <b>n</b>                      | 174                           |
| <b>Engel 1</b>                | 100                           |
| <b>Sensitivity</b>            | 63% (55% - 70%)               |
| <b>Specificity</b>            | 85% (79% - 90%)               |
| <b>PPV</b>                    | 85% (79% - 90%)               |
| <b>NPV</b>                    | 63% (55% - 70%)               |
| <b>DOR</b>                    | 9.8 (4.6 - 20.8)              |
| <b>PLR</b>                    | 4.2 (3.6 - 5.1)               |
| <b>NLR</b>                    | 0.4 (0.4 - 0.5)               |
| <b>Engel 1a</b>               | 69                            |
| <b>Sensitivity</b>            | 59% (52% - 67%)               |
| <b>Specificity</b>            | 69% (61% - 75%)               |
| <b>PPV</b>                    | 55% (48% - 63%)               |
| <b>NPV</b>                    | 72% (65% - 78%)               |
| <b>DOR</b>                    | 3.2 (1.7 - 6.0)               |
| <b>PLR</b>                    | 1.9 (1.5 - 2.4)               |
| <b>NLR</b>                    | 0.6 (0.5 - 0.8)               |

Supplementary table 4: Parameters of diagnostic accuracy of complete MEG resection for a seizure free outcome (Engel 1 and Engel 1A) at the last available outcome, including early outcomes <1 year. PPV, NPV – positive, negative predictive value; DOR – diagnostic odds ratio; PLR, NLR – positive, negative likelihood ratio.

| <b>All lesionectomies</b> |                  |                  |                          |
|---------------------------|------------------|------------------|--------------------------|
| <b>Follow-up</b>          | <b>&gt;= 1y</b>  | <b>&gt;=5y</b>   | <b>Including &lt;1y</b>  |
| <b>n</b>                  | 234              | 129              | 284                      |
| <b>Engel 1</b>            | 139              | 82               | 167                      |
| <b>Sensitivity</b>        | 96% (93% - 98%)  | 96% (91% - 99%)  | 96% (93% - 98%)          |
| <b>Specificity</b>        | 19% (14% - 25%)  | 19% (13% - 27%)  | 21% (16% - 26%)          |
| <b>PPV</b>                | 64% (57% - 70%)  | 68% (59% - 75%)  | 63.39% (57.46% - 68.95%) |
| <b>NPV</b>                | 78% (72% - 83%)  | 75% (66% - 82%)  | 80.00% (74.77% - 84.43%) |
| <b>DOR</b>                | 6.3 (2.2 - 17.5) | 6.2 (1.6 - 24.4) | 6.9 (2.7 - 17.6)         |
| <b>PLR</b>                | 1.2 (0.9 - 1.5)  | 1.2 (0.8 - 1.7)  | 1.2 (1.0 - 1.5)          |
| <b>NLR</b>                | 0.2 (0.2 - 0.2)  | 0.2 (0.1 - 0.3)  | 0.2 (0.1 - 0.2)          |
| <b>Engel 1a</b>           | 97               | 51               | 122                      |
| <b>Sensitivity</b>        | 98% (95% - 99%)  | 98% (93% - 100%) | 98% (95% - 99%)          |
| <b>Specificity</b>        | 15% (11% - 21%)  | 14% (89% - 21%)  | 17% (13% - 22%)          |
| <b>PPV</b>                | 45% (39% - 52%)  | 43% (34% - 52%)  | 47% (41% - 53%)          |
| <b>NPV</b>                | 91% (87% - 95%)  | 92% (85% - 96%)  | 90% (86% - 93%)          |
| <b>DOR</b>                | 8.6 (2.0 - 37.6) | 8.2 (1.0 - 65.7) | 7.9 (2.4 - 26.8)         |
| <b>PLR</b>                | 1.2 (1.0 - 1.4)  | 1.1 (0.9 - 1.5)  | 1.2 (1.0 - 1.4)          |
| <b>NLR</b>                | 0.1 (0.1 - 0.2)  | 0.1 (0.1 - 0.2)  | 0.2 (0.1 - 0.2)          |

Supplementary table 5: Parameters of diagnostic accuracy of complete or extended lesionectomy for a seizure free outcome (Engel 1 and Engel 1A). All lesional cases were considered, irrespective of IEDs on MEG. PPV, NPV – positive, negative predictive value; DOR – diagnostic odds ratio; PLR, NLR – positive, negative likelihood ratio.

| <b>Lesionectomies in cases with MEG resection data</b> |                               |
|--------------------------------------------------------|-------------------------------|
| <b>Follow-up</b>                                       | <b>All (Including &lt;1y)</b> |
| <b>n</b>                                               | 134                           |
| <b>Engel 1</b>                                         | 84                            |
| <b>Sensitivity</b>                                     | 96% (91% - 99%)               |
| <b>Specificity</b>                                     | 8% (4% - 14%)                 |
| <b>PPV</b>                                             | 64% (55% - 72%)               |
| <b>NPV</b>                                             | 57% (48% - 66%)               |
| <b>DOR</b>                                             | 2.4 (0.5 - 11.0)              |
| <b>PLR</b>                                             | 1.1 (0.5 - 2.0)               |
| <b>NLR</b>                                             | 0.5 (0.2 - 0.9)               |
| <b>Engel 1a</b>                                        | 57                            |
| <b>Sensitivity</b>                                     | 98% (94% - 100%)              |
| <b>Specificity</b>                                     | 8% (4% - 14%)                 |
| <b>PPV</b>                                             | 44% (36% - 53%)               |
| <b>NPV</b>                                             | 86% (78% - 91%)               |
| <b>DOR</b>                                             | 4.7 (0.6 - 40.5)              |
| <b>PLR</b>                                             | 1.1 (0.7 - 1.5)               |
| <b>NLR</b>                                             | 0.2 (0.2 - 0.3)               |

Supplementary table 6: Parameters of diagnostic accuracy of complete or extended lesionectomy for a seizure free outcome (Engel 1 and Engel 1A) at the last available outcome, including early outcomes <1 year. Only cases with IEDs on MEG and information on MEG resection were considered, corresponding to table 2. Nc – not computable due to zeros in the denominator, etc. PPV, NPV – positive, negative predictive value; DOR – diagnostic odds ratio; PLR, NLR – positive, negative likelihood ratio.
